# Effects of Internal Conductance on the Temperature Dependence of the Photosynthetic Rate in Spinach Leaves from Contrasting Growth Temperatures

Wataru Yamori<sup>1,\*</sup>, Ko Noguchi<sup>1</sup>, Yuko T. Hanba<sup>2</sup> and Ichiro Terashima<sup>1,3</sup>

<sup>1</sup> Department of Biology, Graduate School of Science, Osaka University, 1-1 Machikaneyama-cho, Toyonaka, Osaka, 560-0043 Japan

<sup>2</sup> Center for Bioresource Research Science, Kyoto Institute of Technology, Matsugasaki, Sakyo-ku, Kyoto, 606-8585 Japan

The photosynthetic rate may be strongly limited by internal conductance from the intercellular airspace to the chloroplast stroma ( $g_i$ ). However, the effects of growth and leaf temperature on  $g_i$  are still unclarified. In this work, we determined the temperature dependence of  $g_i$  in spinach leaves grown at 30/25°C (high temperature; HT) and 15/10°C (low temperature; LT), using the concurrent measurements of the gas exchange rate and stable carbon isotope ratio. Moreover, we quantified the effects of  $g_i$  on the temperature dependence of the photosynthetic rate. We measured  $g_i$  and the photosynthetic rate at a CO<sub>2</sub> concentration of 360 μl l<sup>-1</sup> under saturating light ( $A_{360}$ ) at different leaf temperatures. The optimum temperature for  $A_{360}$  was 28.5°C in HT leaves and 22.9°C in LT leaves. The optimum temperatures for  $g_i$  were almost similar to those of  $A_{360}$  in both HT and LT leaves. There was a strong linear relationship between  $A_{360}$  and  $g_i$ . The photosynthetic rates predicted from the C<sub>3</sub> photosynthesis model taking account of  $g_i$  agreed well with  $A_{360}$  in both HT and LT leaves. The temperature coefficients (Q<sub>10</sub>) of  $g_i$  between 10 and 20°C were 2.0 and 1.8 in HT and LT leaves, respectively. This suggests that  $g_i$  was determined not only by physical diffusion but by processes facilitated by protein(s). The limitation of the photosynthetic rate imposed by  $g_i$  increased with leaf temperature and was greater than the limitation of the stomatal conductance at any temperature, in both HT and LT leaves. This study suggests that  $g_i$  substantially limits the photosynthetic rate, especially at higher temperatures.

**Keywords:** CO<sub>2</sub> concentration in the chloroplast ( $C_c$ ) — Internal conductance — Photosynthesis — Stomatal conductance — Temperature acclimation — Temperature dependence.

Abbreviations:  $C_a$ , ambient CO<sub>2</sub> concentration;  $C_c$ , chloroplast CO<sub>2</sub> concentration;  $C_i$ , intercellular CO<sub>2</sub> concentration;  $g_i$ , internal conductance;  $g_s$ , stomatal conductance; HT, high temperature (30/25°C);  $Lg_i$ , limitation of the photosynthetic rate by  $g_i$ ;  $Lg_s$ , limitation of the photosynthetic rate by  $g_s$ ; LT, low temperature (15/10°C); RuBP, ribulose-1,5-bisphosphate;  $S_c$ , surface area of chloroplasts exposed to intercellular airspace.

## Introduction

Alteration of plant growth temperature results in the change in the temperature dependence of the leaf photosynthetic rate (Berry and Björkman 1980, Yamori et al. 2005, Yamori et al. 2006). The temperature dependence of the photosynthetic rate is affected by the intercellular CO<sub>2</sub> concentration ( $C_i$ , Berry and Björkman 1980, Farquhar et al. 1980, Kirschbaum and Farquhar 1984, Hikosaka et al. 2006). The effects of growth temperature on  $C_i$  are different among species. In some studies,  $C_i$  was found to decrease when plants were grown at low temperatures (Ferrar et al. 1989, Williams and Black 1993, Hikosaka et al. 1999, Hikosaka et al. 2005), but in others,  $C_i$  did not change (Ferrar et al. 1989, Hendrickson et al. 2004). In *Quercus myrsinaefolia*,  $C_i$  was markedly lower in leaves grown at a low temperature due to low stomatal conductance, and the average  $C_i$  were 230 and 300 μl l<sup>-1</sup> for leaves grown at the low and high temperatures, respectively (Hikosaka et al. 1999). The authors claimed that such differences in  $C_i$  might cause a shift of the optimum temperature of the photosynthetic rate by approximately 3°C.

It was assumed that the CO<sub>2</sub> concentration in the chloroplast stroma ( $C_c$ ) was equal to the  $C_i$  (Farquhar et al. 1980). However, it is now clear that this assumption is incorrect. Recent studies showed that  $C_c$  is significantly lower than  $C_i$  due to the finite internal conductance from the intercellular airspace to the chloroplast stroma ( $g_i$ ) and that this drawdown in CO<sub>2</sub> concentration from  $C_i$  to  $C_c$  significantly limits photosynthesis (Loreto et al. 2003, Warren et al. 2003, Hanba et al. 2004, Warren et al. 2004, Niinemets et al. 2005, Terashima et al. 2006). Both stomatal conductance ( $g_s$ ) and  $g_i$  correlate with the photosynthetic rate and are of the similar magnitude (for a review, see Evans and Loreto 2000). Therefore, the effect of leaf and growth temperatures on  $g_i$  may partly explain the temperature dependence of the photosynthetic rate.

Some authors reported that the magnitude of  $g_i$  is determined by leaf anatomical features such as cell wall

<sup>3</sup> Present address: Department of Biological Sciences, Graduate School of Science, The University of Tokyo, 7-3-1 Hongo, Bunkyo-ku, Tokyo 113-0033 Japan.

\*Corresponding author: E-mail, wataru-y@bio.sci.osaka-u.ac.jp; Fax, +81-6-6850-5808.

thickness (Nobel 1991, Kogami et al. 2001, Miyazawa and Terashima 2001) and the surface areas of mesophyll cells ( $S_{mes}$ ) and chloroplasts ( $S_c$ ) exposed to intercellular air spaces (Nobel 1991, von Caemmerer and Evans 1991, Evans et al. 1994, Syvertsen et al. 1995, Evans 1998, Evans and Loreto 2000, Evans 2004). On the other hand, those leaf anatomical features failed to explain the rapid response of  $g_i$  to environmental conditions (Delfine et al. 1998, Delfine et al. 1999, Flexas et al. 2002, Bernacchi et al. 2002, Centritto et al. 2003). Therefore, it has been suggested that  $g_i$  is closely associated with proteins, such as aquaporins (Terashima and Ono 2002, Uehlein et al. 2003, Flexas et al. 2004, Hanba et al. 2004) and/or carbonic anhydrase (Makino et al. 1992, Sasaki et al. 1996, Gillon and Yakir 2000).

Makino et al. (1994) suggested that  $g_i$  is affected by the growth temperature in rice leaves (*Oryza sativa*). They found a decreased photosynthetic rate per unit Rubisco content at low  $C_i$  in leaves grown at low temperature, and argued that this effect was the result of a decrease in  $C_c$  because Rubisco was not inactivated at these temperatures. On the other hand, in leaves of *Nerium oleander*, simultaneous measurements of gas exchange and Chl fluorescence suggested that  $C_c$  was not different between the growth temperatures (Hikosaka and Hirose 2001). There is only one report on the temperature dependence of  $g_i$ . Bernacchi et al. (2002) determined the temperature dependence of  $g_i$  by simultaneous measurements of gas exchange and Chl fluorescence in tobacco leaves (*Nicotiana tabacum*) grown at 25/18°C (day/night). They showed that  $g_i$  strongly depended on the leaf temperature, with an optimum temperature at 35–37.5°C, and progressively limited the photosynthetic rate at higher temperatures. However,  $g_i$  obtained by the simultaneous measurements of gas exchange and Chl fluorescence may not be reliable, because the method is based on a simple assumption that the difference between the electron transport rates estimated from gas exchange and that from Chl fluorescence is fully explained by  $g_i$ . There are many reports that alternative pathways, such as the water–water cycle and cyclic electron flow, are stimulated under conditions under which photosynthetic rates are limited, such as low and high temperatures (for reviews, see Arnon 1995, Asada 2000, Heber 2002, Öquist and Huner 2003, Sharkey 2005). Therefore, the method employing the concurrent measurements of the gas exchange rate and stable carbon isotope ratio has been widely regarded to be more reliable (for a review, see Evans and Loreto 2000). Thus, the dependence of  $g_i$  on measurement and growth temperatures should be evaluated by the latter method.

In this study, we determined the temperature dependences of  $g_i$  and the photosynthetic rate at a  $CO_2$  concentration of  $360 \mu\text{l l}^{-1}$  under saturating light conditions

in spinach leaves grown at 30/25 (high temperature; HT) and 15/10°C (low temperature; LT). The value of  $g_i$  was estimated for intact leaves by the concurrent measurements of the gas exchange rate and stable carbon isotope ratio. Based on the results of these measurements, we addressed several key questions. (i) Does  $g_i$  strongly depend on the leaf temperature? This could indicate whether the processes concerned with  $g_i$  are controlled by proteins which facilitate  $CO_2$  diffusion. (ii) Does the temperature dependence of  $g_i$  change depending on the growth temperature? (iii) To what extent do such changes in  $g_i$  contribute to the changes in the temperature dependence of the photosynthetic rate depending on the growth temperature?

## Results

### Temperature dependences of photosynthetic rate, $g_s$ and $g_i$

The temperature dependences of the net photosynthetic rate at an ambient  $CO_2$  concentration ( $C_a$ ) of  $360 \mu\text{l l}^{-1}$  under saturating light were different depending on the growth temperature (Fig. 1a), as has been previously reported (Yamori et al. 2005, Yamori et al. 2006).

The optimum temperatures for the photosynthetic rate were 28.5°C in HT leaves and 22.9°C in LT leaves, when the temperature dependences of the photosynthetic rates were fitted by cubic curves.  $g_s$  in HT leaves was greater than that in LT leaves at any temperature, and the optimum temperatures for  $g_s$  were 20–25°C in both HT and LT leaves (Fig. 1b). Temperature dependences of the actual carbon isotope discrimination ( $\Delta$ ) and the differences between the expected carbon isotope discrimination ( $\Delta_i$ ) and  $\Delta$  were almost constant in both HT and LT leaves, except for somewhat greater  $\Delta$  in HT leaves and  $\Delta_i - \Delta$  in LT leaves at low temperatures (Fig. 1c).  $\Delta$  in HT leaves was greater than that in LT leaves at any temperature, while,  $\Delta_i - \Delta$  values were almost similar between HT and LT leaves except for at the lowest temperatures. Using  $\Delta_i - \Delta$ ,  $g_i$  was calculated by Equation 1 (see Materials and Methods). The  $g_i$  were different depending on the growth temperature (Fig. 1d). The optimum temperatures for  $g_i$  were almost similar to those of the photosynthetic rate in both HT and LT leaves. The values for  $g_i$  at the respective optimum temperatures were  $0.22 \text{ mol m}^{-2} \text{ s}^{-1}$  in HT leaves and  $0.21 \text{ mol m}^{-2} \text{ s}^{-1}$  in LT leaves. At higher temperatures, we found a decrease in  $g_i$  in the LT leaves, but this effect was not clear in HT leaves. At lower temperatures, the effect of temperature on  $g_i$  was very similar in HT and in LT leaves. The temperature coefficients ( $Q_{10}$ ) for  $g_i$  between 10 and 20°C were 1.99 in HT leaves and 1.84 in LT leaves, respectively.

When the data of HT and LT leaves were pooled separately, the relationships between the photosynthetic rate and  $g_s$  were barely observed (Fig. 2a; HT,  $R^2 = 0.51$ ;

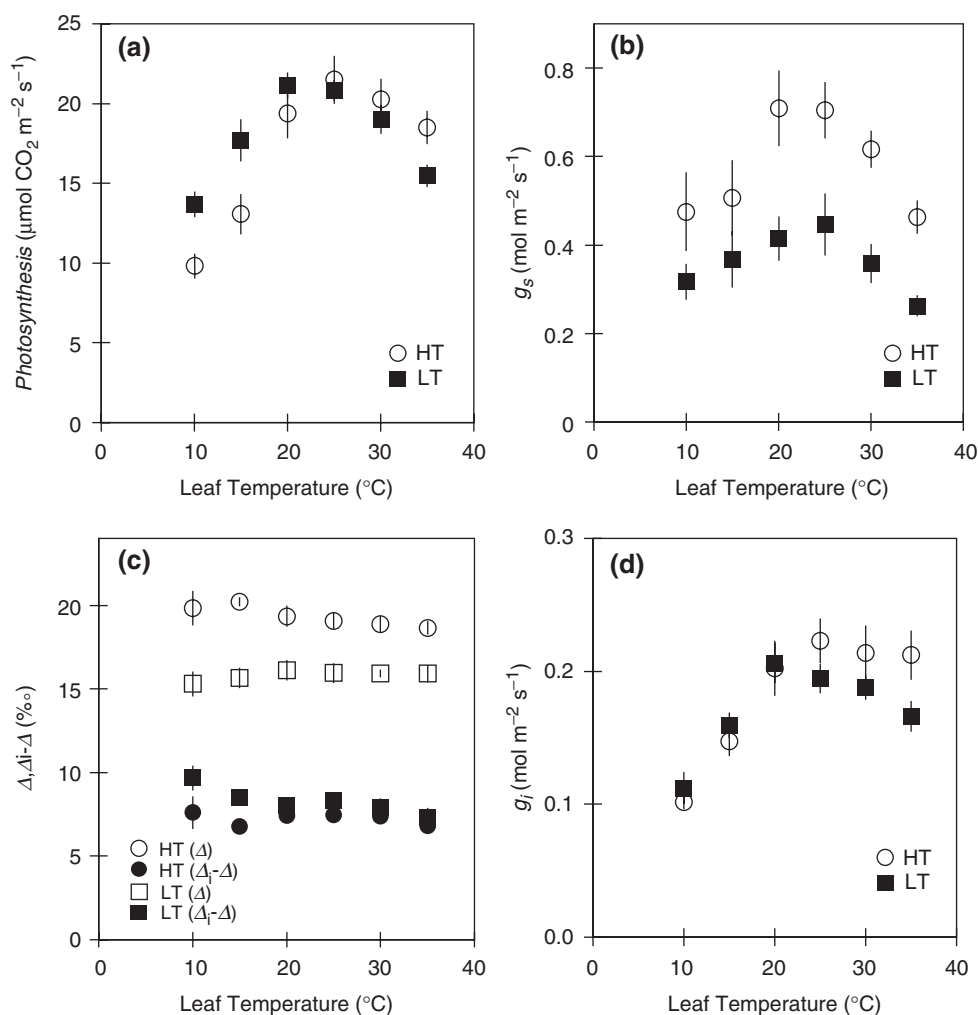

**Fig. 1** Temperature dependences of net photosynthetic rate (a), stomatal conductance (b;  $g_s$ ), the actual carbon isotope discrimination ( $\Delta$ ) and the differences between the expected carbon isotope discrimination ( $\Delta_i$ ) and  $\Delta$  (c), and internal conductance (d;  $g_i$ ). HT (circles) and LT (squares) denote the leaves grown at day/night air temperature of 30/25 and 15/10°C, respectively. Gas exchange was measured at an ambient  $\text{CO}_2$  concentration of  $360 \mu\text{l l}^{-1}$  under a saturating light intensity of  $1,500 \mu\text{mol m}^{-2} \text{ s}^{-1}$ . Internal conductance was estimated by the concurrent measurements of the gas exchange rate and stable carbon isotope ratio. Data represent means  $\pm$  SE,  $n = 5$ .

LT,  $R^2 = 0.74$ ). On the other hand, there were strong linear regressions between the photosynthetic rate and  $g_i$ , in both HT and LT leaves (Fig. 2b; HT,  $R^2 = 0.97$ ; LT,  $R^2 = 0.86$ ). The temperature dependences of  $g_i/g_s$  were different depending on the growth temperature (Fig. 2c). The values of  $g_i/g_s$  showed similar values at the respective growth temperatures in HT and LT leaves.

The  $C_i$  tended to decrease with increasing temperature, in both HT and LT leaves (Fig. 3a).  $C_i$  in HT leaves was approximately  $30 \mu\text{l l}^{-1}$  greater than that in LT leaves (Fig. 3a). The  $C_c$  were almost constant at any temperature in both HT and LT leaves (Fig. 3b).  $C_c$  in HT leaves was approximately  $50 \mu\text{l l}^{-1}$  higher than that in LT leaves (Fig. 3b). The  $C_i/C_a$  ratio decreased with

increasing temperature (Fig. 3c), whereas,  $C_c/C_i$  and  $C_c/C_a$  were almost constant at any temperature in both HT and LT leaves (Fig. 3d, e).  $C_c/C_i$  was considerably lower than  $C_i/C_a$  in both HT and LT leaves. The  $\text{CO}_2$  drawdowns caused by low  $g_s$  (the difference between the ambient and intercellular  $\text{CO}_2$  concentrations,  $C_a - C_i$ ) at 25°C were 43.2 and  $75.1 \mu\text{l l}^{-1}$  in HT and LT leaves, respectively. On the other hand, the  $\text{CO}_2$  drawdowns caused by low  $g_i$  (the difference between intercellular and chloroplast  $\text{CO}_2$  concentrations,  $C_i - C_c$ ) at 25°C were 96.8 and  $108 \mu\text{l l}^{-1}$  in HT and LT leaves, respectively. The reduction in both  $g_s$  and  $g_i$  caused the  $\text{CO}_2$  drawdowns from ambient air to the chloroplast stroma in both HT and LT leaves.

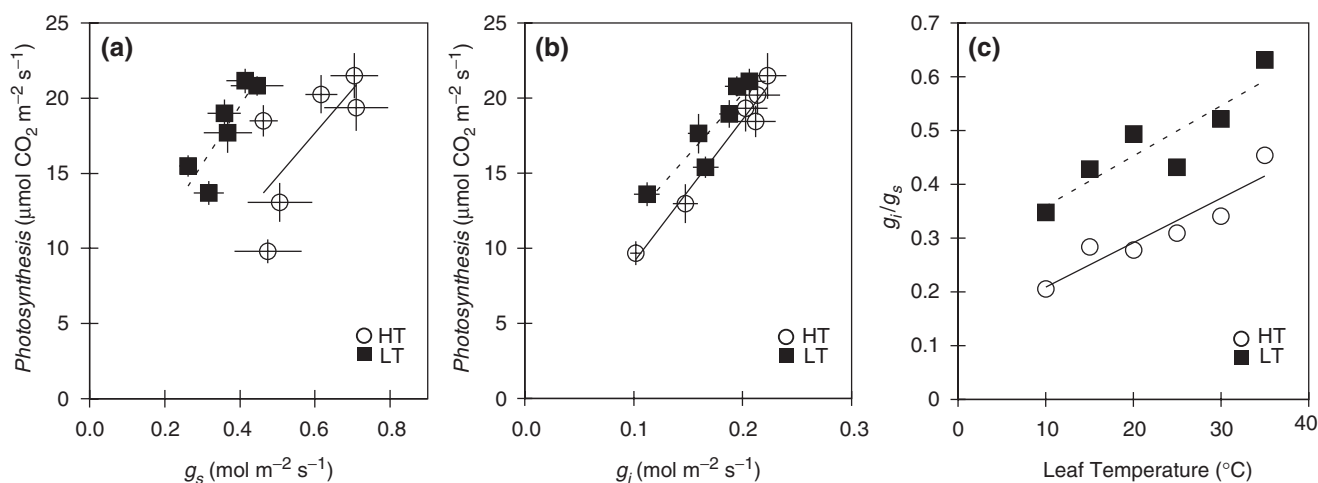

**Fig. 2** Relationships between photosynthetic rate and stomatal conductance (a;  $g_s$ ) or internal conductance (b;  $g_i$ ). The regression lines shown are: (a) HT (solid line),  $y = 29.14x + 0.214$  ( $R^2 = 0.51$ ); LT (dotted line),  $y = 38.64x + 4.016$  ( $R^2 = 0.74$ ), (b) HT (solid line),  $y = 93.96x - 0.144$  ( $R^2 = 0.97$ ); LT (dotted line),  $y = 81.28x + 4.065$  ( $R^2 = 0.86$ ). Temperature dependence of the ratio between internal conductance and stomatal conductance (c). The regression lines shown are: HT (solid line),  $y = 0.0081x + 0.136$  ( $R^2 = 0.87$ ); LT (dotted line),  $y = 0.0092x + 0.273$  ( $R^2 = 0.81$ ). Abbreviations and symbols are the same as those in Fig. 1. Data represent means  $\pm$  SE,  $n = 5$ .

#### Effects of $g_s$ and $g_i$ on the temperature dependence of the photosynthetic rate

We evaluated the effects of  $g_s$  and  $g_i$  on the temperature dependence of the photosynthetic rate (Fig. 4). As described in model A in Materials and Methods,  $P_c(C_a)$  was calculated assuming infinite values for  $g_s$  and  $g_i$ ,  $P_c(C_i)$  was calculated assuming a finite value for  $g_s$  and an infinite value for  $g_i$ , and  $P_c(C_c)$  was calculated using finite values for  $g_s$  and  $g_i$ . The values for the measured photosynthetic rates were taken from the data set presented in Fig. 1a. At low temperatures,  $P_c(C_a)$ ,  $P_c(C_i)$  and  $P_c(C_c)$  nearly matched the measured photosynthetic rate, both in HT and in LT leaves (Fig. 4a, b). The extents of the decrease in all of the calculated photosynthetic rates at low temperatures in the HT leaf were greater than those in the LT leaf. At moderately high temperatures,  $P_c(C_a)$  and  $P_c(C_i)$  were much higher than the measured photosynthetic rates in both HT and LT leaves. However,  $P_c(C_c)$  agreed well with the measured photosynthetic rates in both HT and LT leaves at high temperatures.

When the temperature dependences of the photosynthetic rates were fitted by cubic curves, the optimum temperatures for  $P_c(C_a)$ ,  $P_c(C_i)$ ,  $P_c(C_c)$  and the measured photosynthetic rate were 29.3, 28.8, 28.4 and 28.5°C in HT leaves (Fig. 4a). In contrast, in LT leaves, the optimum temperatures of  $P_c(C_a)$ ,  $P_c(C_i)$ ,  $P_c(C_c)$  and the measured photosynthetic rate were 25.7, 24.7, 22.9 and 22.9°C (Fig. 4b). For both leaf types, we found that the optimum temperatures for the calculated photosynthetic rate  $P_c(C_c)$  were very similar to those of the measured photosynthetic rate in both HT and LT leaves (Fig. 4a, b). The temperature

dependences of  $P_c(C_c)$  were closely related to those of the measured photosynthetic rates over the entire temperature range. We analyzed the relationship between the measured photosynthetic rate and  $P_c(C_c)$  in both HT and LT leaves. The measured photosynthetic rate ( $y$ ) agreed with  $P_c(C_c)$  ( $x$ ), when the data of HT and LT leaves were pooled ( $y = 0.95x$ ,  $R^2 = 0.70$ ).

We evaluated the limitation of the photosynthetic rate by  $g_s$  and  $g_i$  in HT and LT leaves (Fig. 4c, d). The limitations of the photosynthetic rate by  $g_s$  ( $Lg_s$ ) and  $g_i$  ( $Lg_i$ ) are expressed as the proportionate decreases in the photosynthetic rate, compared with the rates calculated by assuming infinite  $g_s$  and  $g_i$ , respectively (Equations 3 and 4).  $Lg_s$  and  $Lg_i$  increased with leaf temperature in both HT and LT leaves.  $Lg_s$  in HT leaves increased from 0.013 at 10°C to 0.136 at 35°C (Fig. 4c), and from 0.040 to 0.254 in LT leaves (Fig. 4d). On the other hand,  $Lg_i$  in HT leaves increased from 0.063 at 10°C to 0.287 at 35°C (Fig. 4c), and from 0.151 to 0.421 in LT leaves (Fig. 4d). At all temperatures examined,  $Lg_i$  was greater than  $Lg_s$ , in both HT and LT leaves. In addition,  $Lg_s$  and  $Lg_i$  in LT leaves were always greater than those in HT leaves at any temperature.

#### Effects of differences in $g_s$ and $g_i$ on the temperature dependence of the photosynthetic rate

Figure 5a, b show the temperature dependences of the predicted photosynthetic rates at various  $C_c$  using Equation A-3 in HT and LT leaves, respectively (see Appendix). In these predictions, it is assumed that  $C_c$  were constant for the overall temperature range. Temperature dependences of the predicted photosynthetic rates differed depending

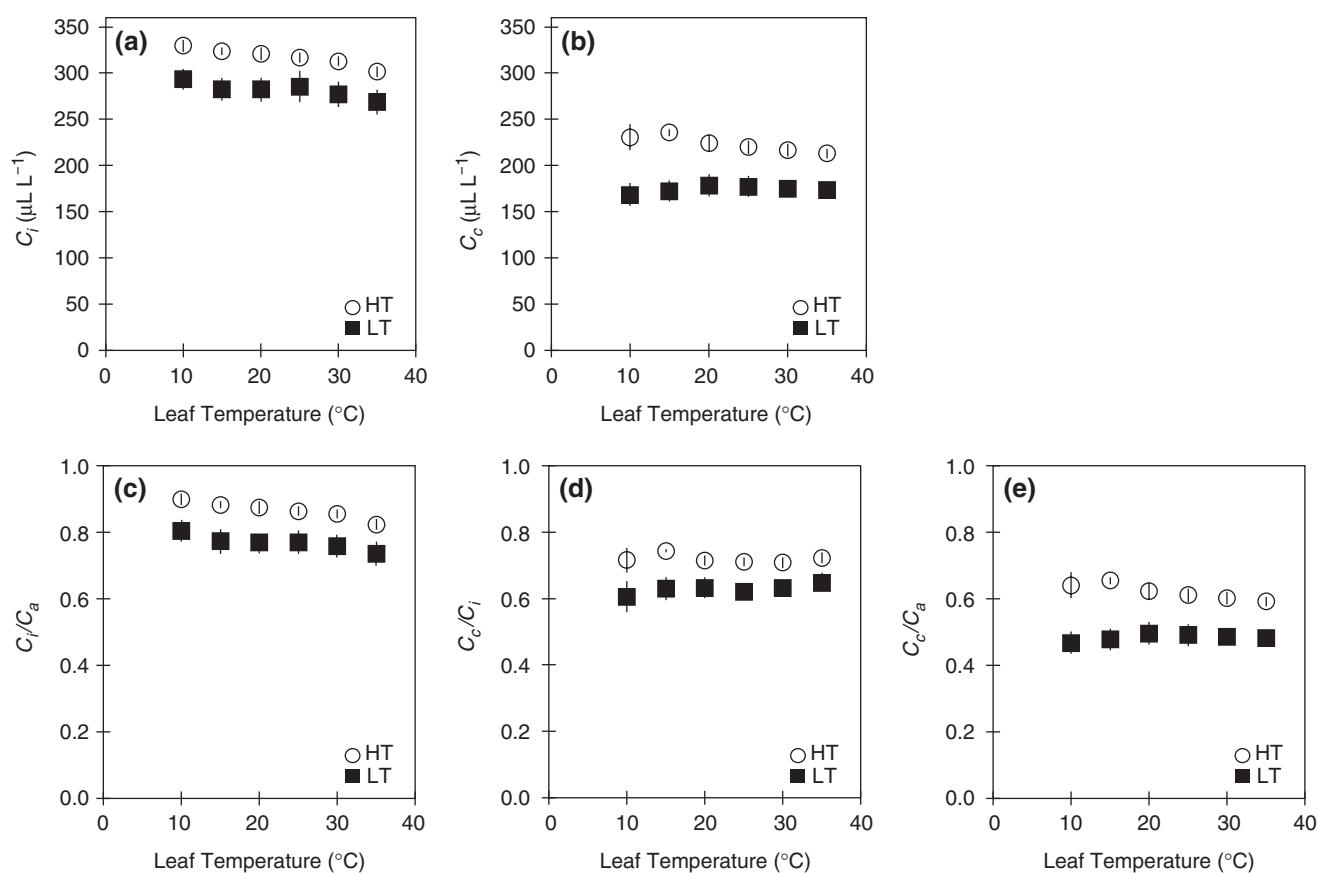

**Fig. 3** The temperature dependence of the CO<sub>2</sub> concentration in the intercellular air space (a;  $C_i$ ) and in the chloroplast (b;  $C_c$ ), and the temperature dependence of the ratio between intercellular and ambient CO<sub>2</sub> concentration (c;  $C_i/C_a$ ), the ratio of chloroplast to intercellular CO<sub>2</sub> concentration (d;  $C_c/C_i$ ) and the ratio of chloroplast to ambient CO<sub>2</sub> concentration (e;  $C_c/C_a$ ). Abbreviations and symbols are the same as those in Fig. 1. Data represent means  $\pm$  SE,  $n = 5$ .

on  $C_c$  in both HT and LT leaves. The optimum temperature of the photosynthetic rate shifted towards lower temperatures with the decrease in  $C_c$ . These findings indicate that the optimum temperature in LT leaves was lower than that in HT leaves if  $C_c$  in LT leaves was lower than that in HT leaves. It is obvious that the optimum temperatures of the photosynthetic rate do not change very much if the differences in  $C_c$  between HT and LT leaves are small. On the other hand, the optimum temperatures of the photosynthetic rate change greatly if the differences in  $C_c$  between HT and LT leaves are large.

$C_i$  and  $C_c$  were different between different growth temperatures by approximately 30 and 50  $\mu\text{L l}^{-1}$ , respectively (Fig. 3a, b). We examined the effects of the differences in  $g_s$  and  $g_i$  on the temperature dependence of the photosynthetic rate, since the temperature dependence of the photosynthetic rate is thought to be affected by  $C_c$  (Hikosaka et al. 2006). Fig. 5c, d showed the effects of differences in  $C_i$  on the temperature dependence of the photosynthetic rate in HT and LT leaves, respectively. We estimated the

temperature dependence of the photosynthetic rate in HT leaves at values for  $C_i$  obtained for LT leaves (Fig. 5c) and, similarly, we estimated the temperature dependence in LT leaves at values for  $C_i$  obtained for HT leaves (Fig. 5d). A change in  $C_i$  hardly affected the temperature dependence of the photosynthetic rate (Fig. 5c, d). The effect of  $C_i$  on the optimum temperature was small, and produced a difference of only 0.7–1.0°C.

Figure 5e, f showed the effects of differences in  $C_c$  on the temperature dependence of the photosynthetic rate in HT and LT leaves, respectively. We estimated the temperature dependence of the photosynthetic rate in HT leaves at values for  $C_c$  obtained for LT leaves (Fig. 5e) and, similarly, we estimated the temperature dependence in LT leaves at values for  $C_c$  obtained for HT leaves (Fig. 5f). A change in  $C_c$  affected the temperature dependence of the photosynthetic rate (Fig. 5e, f). The effect of a different  $C_c$  on the optimum temperature of the photosynthetic rate was larger than that of  $C_i$ , and produced shifts of 1.5–1.8°C.

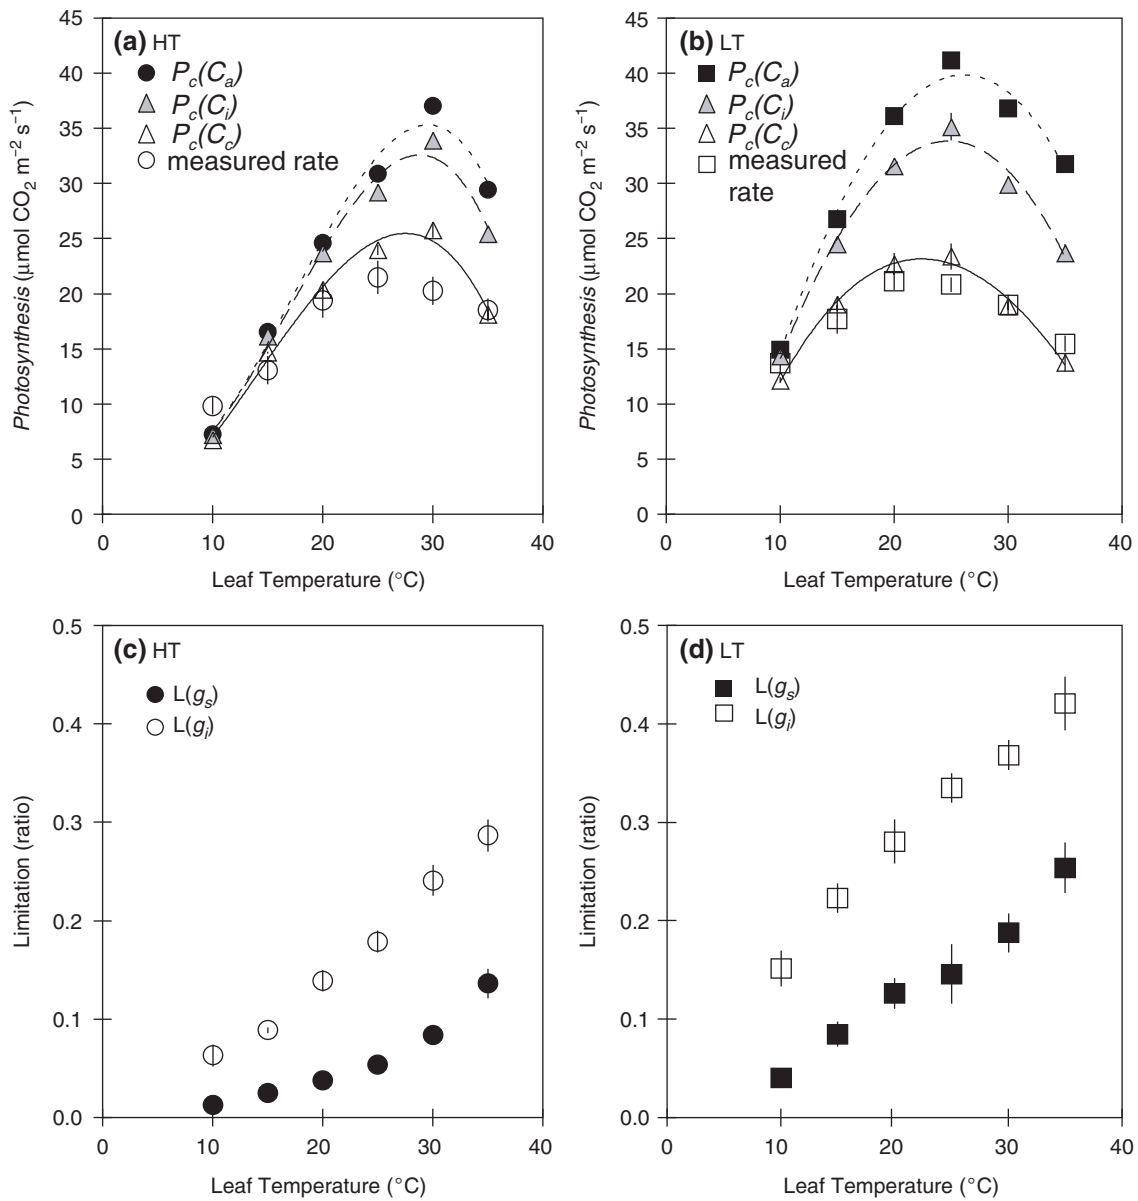

**Fig. 4** Effects of stomatal conductance ( $g_s$ ) and internal conductance ( $g_i$ ) on the temperature dependence of the photosynthetic rate in HT (a) and LT leaves (b).  $P_c(C_a)$  was calculated from the photosynthetic rate at  $C_a = C_i = C_c = 360 \mu\text{l l}^{-1}$  assuming that both  $g_s$  and  $g_i$  were infinite (HT; filled circle, LT; filled square).  $P_c(C_i)$  was calculated from the photosynthetic rate at  $C_c = C_i$  assuming values for  $g_s$  obtained in this study, while  $g_i$  was assumed to be infinite (HT, LT; gray triangle).  $P_c(C_c)$  was calculated from the photosynthetic rate assuming values for  $g_s$  and  $g_i$  obtained from measurements in this study (HT, LT; open triangle). The data were fitted by cubic curves. The values of the measured photosynthetic rates were equal to those presented in Fig. 1 (HT, open circle; LT, open square). The limitation of the photosynthetic rate by  $g_s$  ( $L(g_s)$ , HT; filled circle, LT; filled square) and  $g_i$  ( $L(g_i)$ , HT; open circle, LT; open square) in HT (c) and LT leaves (d). Data represent means  $\pm$  SE,  $n = 5$ .

## Discussion

### Temperature dependences of the photosynthetic rate and $g_i$

We clearly showed that the temperature dependences of  $g_i$  were different depending on the growth temperature, particularly at high temperatures (Fig. 1d). The optimum

temperatures of  $g_i$  were very similar to those of the photosynthetic rate, in both HT and LT leaves (Fig. 1a, d). We also showed that the photosynthetic rate positively depended on  $g_i$ , in both HT and LT leaves (Fig. 2b; HT,  $R^2 = 0.97$ ; LT,  $R^2 = 0.86$ ). Using the method based on the simultaneous measurements of gas exchange and

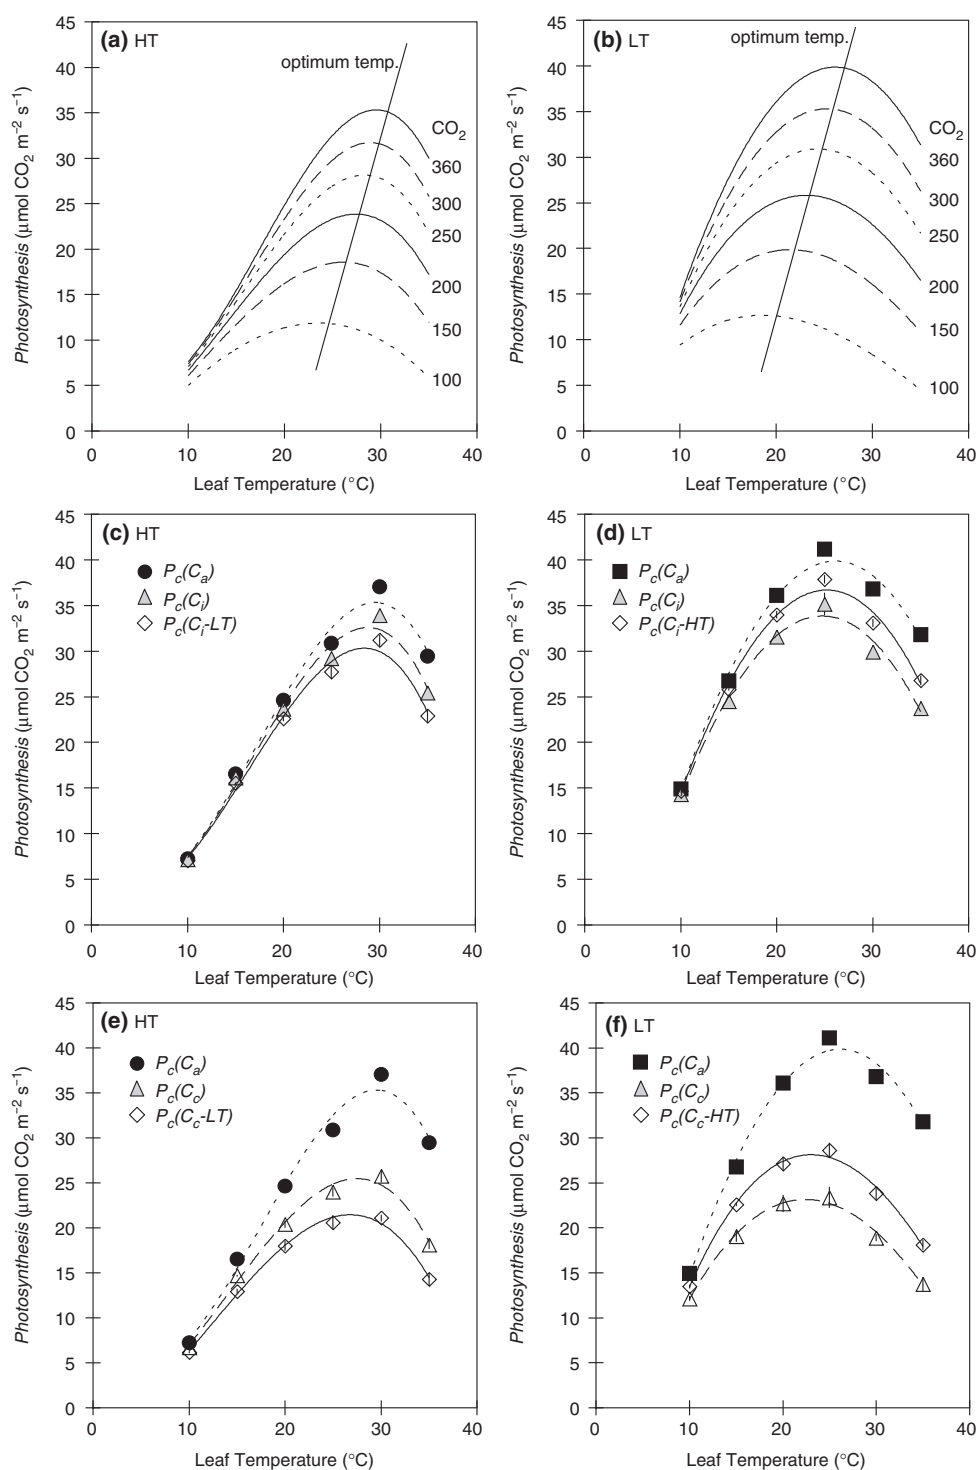

**Fig. 5** Temperature dependence of the predicted photosynthetic rate at different  $C_c$  in HT (a) and LT leaves (b). It is assumed that  $C_c$  was constant for the overall temperature range. The effects of differences in stomatal conductance ( $g_s$ ) and internal conductance ( $g_i$ ) on the temperature dependence of the photosynthetic rate in HT (c, e) and LT leaves (d, f). Abbreviations and symbols for  $P_c(C_a)$ ,  $P_c(C_i)$  and  $P_c(C_c)$  in HT and LT leaves are the same as those in Fig. 4.  $P_c(C_i - LT)$  in (c) HT was calculated from the photosynthetic rate in HT leaves at  $C_i$  obtained for LT leaves.  $P_c(C_i - HT)$  in (d) LT was calculated from the photosynthetic rate in LT leaves at  $C_i$  obtained for HT leaves.  $P_c(C_c - LT)$  in (e) HT was calculated from the photosynthetic rate in HT leaves at  $C_c$  obtained for HT leaves.  $P_c(C_c - HT)$  in (f) LT was calculated from the photosynthetic rate in LT leaves at  $C_c$  obtained for HT leaves. The data were fitted by cubic curves. Data represent means  $\pm$  SE,  $n = 5$ .

Chl fluorescence, Bernacchi et al. (2002) showed that  $g_i$  was strongly dependent on the leaf temperature, with a sharp peak at 35–37.5°C in tobacco leaves grown at 25/18°C (day/night). The temperature dependence of  $g_i$ , as presented in this work, differed from the data shown by Bernacchi et al. (2002), especially at higher leaf temperatures. It is possible that the discrepancy between our results and the previously published data for the temperature dependence of  $g_i$  resulted from differences in plant species and/or in growth conditions. Alternatively, it is also probable that the discrepancy is due to the difference in the method. The measurement of  $g_i$  by the combination of gas exchange and Chl fluorescence is based on the assumption that the difference between the electron transport rates estimated from gas exchange and estimated from Chl fluorescence is fully explained by  $g_i$ . However, it has been reported that alternative pathways, such as the water–water cycle and cyclic electron flow, are stimulated under conditions in which photosynthetic rates are limited, such as low and high temperature (for a review, see Arnon 1995, Asada 2000, Heber 2002, Öquist and Huner 2003, Sharkey 2005). If such alternative pathways are actually enhanced in tobacco leaves at temperatures higher and lower than the optimum temperature, the sharp peak in  $g_i$  reported by Bernacchi et al. (2002) may be due to the underestimation of  $g_i$  at such temperatures.

The  $Q_{10}$  value between 10 and 20°C for the diffusivity of CO<sub>2</sub> in pure water was determined to be around 1.4 (Hesketh et al. 1983). If  $g_i$  is partly determined by proteins, it is thought that the  $Q_{10}$  for  $g_i$  should be approximately 2 or higher (Nobel 1999). The observed  $Q_{10}$  between 10 and 20°C was approximately 2 for  $g_i$  both in HT and in LT leaves (Fig. 1d), suggesting that the determinants of  $g_i$  were not only physical diffusion, but processes facilitated by proteins, such as aquaporin (Terashima and Ono 2002, Uehlein et al. 2003, Flexas et al. 2004, Hanba et al. 2004) and carbonic anhydrase (Makino et al. 1992, Sasaki et al. 1996, Gillon and Yakir 2000). Moreover, the temperature dependence of  $g_i$  was affected by the growth temperature (Fig. 1d). This also strongly suggests the involvement of protein(s) in CO<sub>2</sub> diffusion. If this is the case, the difference in the decrease in  $g_i$  at higher temperatures can be attributed to the differences in the thermal stability and/or the suppressed enzyme activities involved in CO<sub>2</sub> diffusion (Fig. 1d).

Recently, the role of aquaporins in CO<sub>2</sub> diffusion has received much interest. Aquaporins increase the CO<sub>2</sub> permeability of plant cell membranes (Terashima and Ono 2002, Uehlein et al. 2003, Flexas et al. 2004, Hanba et al. 2004). Hanba et al. (2004) overexpressed an aquaporin 2 of *Hordeum vulgare* L. (HvPIP2;1; an aquaporin in the plasma membrane-type subfamily) in rice (*Oryza sativa* L.). They demonstrated that the overexpression of HvPIP2;1, which

increased the level of aquaporins detected by an antibody raised against HvPIP2;1 by 135%, enhanced  $g_i$  in intact rice leaves by 40%. Terashima et al. (2006) roughly estimated that more than two-thirds of CO<sub>2</sub> transported across the plasma membrane is via aquaporins. Carbonic anhydrase is also thought to be involved in CO<sub>2</sub> diffusion (Makino et al. 1992, Sasaki et al. 1996, Gillon and Yakir 2000). However, Price et al. (1994) showed that the antisense reduction of carbonic anhydrase activity to 2% of wild-type levels did not reduce the light-saturated photosynthetic rate at an ambient CO<sub>2</sub> concentration of 360 µl l<sup>-1</sup> at 25°C. Therefore, the role of carbonic anhydrase in internal conductance is still unclear.

Several authors have argued that  $g_i$  is largely constitutive and determined by leaf structural traits such as the surface area of chloroplasts exposed to intercellular air spaces ( $S_c$ ) and cell wall thickness (for a recent review, see Terashima et al. 2006). There is no doubt that  $g_i$  is proportional to  $S_c$  and inversely related to cell wall thickness, since  $S_c$  represents the effective area for CO<sub>2</sub> diffusion and cell wall thickness affects the path length for CO<sub>2</sub> diffusion in the liquid phase. LT leaves in spinach had thick palisade tissue comprising approximately three cell layers, while HT leaves had thin palisade tissue comprising approximately two cell layers (unpublished data). Therefore, it is possible that LT leaves have a greater  $S_c$  than HT leaves. However, Park and Tsunoda (1979) observed that rice plants grown at low temperature had swollen chloroplasts filled with excess starch. Large starch grains might significantly reduce  $S_c$  and disturb CO<sub>2</sub> diffusion in the chloroplast. Starch accumulation was also observed in spinach leaves grown at low temperature (Guy et al. 1992). In addition, changes in cell wall thickness and lipid properties of the membranes depending on the growth temperature might affect the CO<sub>2</sub> permeability. If this is the case, it may counteract the effect of the increased number of palisade cell layers on  $S_c$  in LT leaves. This may be the explanation for the observation that we found little difference in  $g_i$  between HT and LT leaves, compared with maximum values at the respective optimum temperature for  $g_i$  (Fig. 1d).

#### *Effects of $g_s$ and $g_i$ on the temperature dependence of the photosynthetic rate*

We evaluated the effects of  $g_s$  and  $g_i$  on the temperature dependence of the photosynthetic rate (Fig. 4a, b). The photosynthetic rate calculated assuming an infinite value for  $g_i$  [ $P_c(C_a)$  and  $P_c(C_i)$ ] deviated from the measured photosynthetic rate at high temperatures, in both HT and LT leaves. However, the photosynthetic rate calculated using finite values for  $g_s$  and  $g_i$  [ $P_c(C_c)$ ] agreed well with the measured photosynthetic rates at high temperature, and properly reproduced the shift in the optimum temperature



for the photosynthetic rate in both HT and LT leaves (Fig. 4a, b).

The limitation of the photosynthetic rate by  $g_s$  ( $Lg_s$ ) and  $g_i$  ( $Lg_i$ ) was estimated by Equations 3 and 4. Both  $g_s$  and  $g_i$  became increasingly limiting to the photosynthetic rate as the temperature increased (Fig. 4c, d). The  $\text{CO}_2$  drawdowns caused by finite  $g_s$  and  $g_i$  (the difference between ambient and chloroplast  $\text{CO}_2$  concentration,  $C_a - C_c$ ) were mainly the result of the limitation by  $g_i$  rather than that by  $g_s$ , because  $Lg_i$  was greater than  $Lg_s$  at all temperatures in both HT and LT leaves (Fig. 4c, d). This clearly showed that  $g_i$  imposed a very substantial limitation to the photosynthetic rate, irrespective of the growth temperatures, especially at high temperatures. In our previous study, we showed that the photosynthetic performance is largely determined by Rubisco kinetics at low temperatures, but by the Rubisco kinetics and Rubisco activation state at high temperatures (Yamori et al. 2006). In this study, we showed that, at high temperature, the photosynthetic performance is determined not only by the Rubisco kinetics and Rubisco activation state but also by  $g_i$ .

The temperature dependence of the photosynthetic rate is thought to be affected by  $C_i$  and  $C_c$  (Hikosaka et al. 2006). The values for  $C_i$  and  $C_c$  in LT leaves were less than those in HT leaves by approximately 30 and  $50 \mu\text{l l}^{-1}$ , respectively (Fig. 3a, b). As a sensitivity analysis, we estimated the temperature dependence of the photosynthetic rate in HT leaves at the  $C_c$  obtained for LT leaves (Fig. 5e) and, similarly, that in LT leaves at the  $C_c$  obtained for HT leaves (Fig. 5f). The difference in  $C_c$  affected the temperature dependence and the optimum temperature of the photosynthetic rate by  $1.5\text{--}1.8^\circ\text{C}$ . Therefore, we conclude that the differences in  $C_c$  contribute to the change in the temperature dependence of the photosynthetic rate and may partly explain the shift in the optimum temperature.

In many plants,  $g_i$  is relatively low (for a review, see Evans and Loreto 2000, Ethier and Livingstone 2004, Terashima et al. 2006). These impose a significant limitation to photosynthesis. Furthermore,  $g_i$  was strongly dependent on the leaf temperature and became increasingly limiting to the photosynthetic rate as the temperature increased. Under such conditions, it is impossible to evaluate the photosynthetic rate accurately, if  $g_i$  is not taken into account for the  $C_3$  photosynthesis model (Farquhar et al. 1980). When the temperature dependences of Rubisco kinetic parameters and the Rubisco activation state provided in the previous study (Yamori et al. 2006), and  $g_i$  provided in this study were all taken into account, the  $C_3$  photosynthesis model will be much improved for estimation of the photosynthetic rate over a wide range of temperatures.

We clearly showed that  $g_i$  was strongly dependent on the leaf temperature and had an optimum temperature. Moreover, the temperature dependences of  $g_i$  changed depending on the growth temperature. The temperature dependence of  $g_i$  provided evidence for the view that  $\text{CO}_2$  transfer from the leaf intercellular airspace into the chloroplast would be controlled by processes facilitated by proteins, such as aquaporins and carbonic anhydrase. We also found that  $g_i$  became more limiting to the photosynthetic rate as the temperature increased, in both HT and LT leaves. The limitation by  $g_i$  was larger than that by  $g_s$  at any temperature, in both HT and LT leaves. These results showed that the photosynthetic rate is significantly limited by  $g_i$  at any temperature, but especially at higher temperatures. Together with our previous study (Yamori et al. 2006), we can be fairly certain that, at low temperatures, the photosynthetic performance is largely determined by Rubisco kinetics, while at high temperatures, it is determined by the Rubisco kinetics, Rubisco activation state and  $g_i$ .

## Materials and Methods

### Plant growth conditions

Spinach (*Spinacia oleracea* L. cv. Torai) plants were grown in vermiculite, as described in Yamori et al. (2005). The day/night lengths were 8 and 16 h, respectively. Photosynthetically active photon flux density (PPFD) in the daytime was  $230 \mu\text{mol photons m}^{-2} \text{ s}^{-1}$ . The day/night air temperatures were either 30/25 or 15/10°C. These are referred to as high temperature (HT) and low temperature (LT) conditions, respectively. The leaves grown at HT and LT are called HT and LT leaves, respectively. The plants were watered once a week and fertilized with 200 ml of a nutrient solution containing 2 mM  $\text{KNO}_3$ , 2 mM  $\text{Ca}(\text{NO}_3)_2$ , 0.75 mM  $\text{MgSO}_4$ , 0.665 mM  $\text{NaH}_2\text{PO}_4$ , 25  $\mu\text{M}$  Fe-EDTA, 5  $\mu\text{M}$   $\text{MnSO}_4$ , 0.5  $\mu\text{M}$   $\text{ZnSO}_4$ , 0.5  $\mu\text{M}$   $\text{CuSO}_4$ , 25  $\mu\text{M}$   $\text{H}_3\text{BO}_4$ , 0.25  $\mu\text{M}$   $\text{Na}_2\text{MoO}_4$ , 50  $\mu\text{M}$  NaCl and 0.1  $\mu\text{M}$   $\text{CoSO}_4$  once a week.

### Gas exchange measurements and estimation of internal conductance

Gas exchange measurements were performed at an ambient  $\text{CO}_2$  concentration of  $360 \mu\text{l l}^{-1}$  under saturating light of  $1,500 \mu\text{mol m}^{-2} \text{ s}^{-1}$ , using a laboratory-constructed system with an infrared  $\text{CO}_2/\text{H}_2\text{O}$  gas analyzer (LI-7000; Li-Cor Inc., Lincoln, NE, USA) as described by Hanba et al. (1999, 2002) with slight modifications. The photosynthetic rates were measured at least 30 min after the attainment of the temperature. Gas exchange parameters were calculated according to the method of von Caemmerer and Farquhar (1981). Internal conductance ( $g_i$ ) was estimated for intact leaves by the concurrent measurements of the gas exchange rate and stable carbon isotope ratio (Hanba et al. 1999, Hanba et al. 2002). In the present study,  $g_i$  was calculated using the equation reported by Scartazza et al. (1998):

$$g_i = \frac{(b - a_i)A/C_a}{(\Delta_i - \Delta) - f\Gamma^*/C_a} \quad (1)$$

where  $\Delta$  is the actual carbon isotope discrimination,  $\Delta_i$  is the expected carbon isotope discrimination assuming infinite  $g_i$ ,  $A$  is the photosynthetic rate,  $C_a$  is the ambient  $\text{CO}_2$  concentration,  $a_i$  is the carbon isotope discrimination during  $\text{CO}_2$  diffusion/hydration into water (1.8‰), and  $b$  is the carbon isotope discrimination caused by carboxylation by Rubisco and phosphoenolpyruvate carboxylase (30‰). The symbols  $f$  and  $\Gamma^*$  represent the discrimination caused by photorespiration and the  $\text{CO}_2$  compensation point when day respiration is zero, respectively. Here, we assumed that  $f$  was too small to have a significant effect on  $g_i$  (von Caemmerer and Evans 1991).  $\Delta$  was calculated from carbon isotope ratios of  $\text{CO}_2$  in air leaving and entering the gas exchange chamber.  $\text{CO}_2$  samples were collected using dry ice-ethanol and liquid nitrogen traps. The carbon isotope ratio was determined with an isotope mass spectrometer (MAT 252, Thermo Finnigan, Bremen, Germany).

The  $\text{CO}_2$  concentration in the chloroplast stroma ( $C_c$ ) was calculated using the equation:

$$C_c = C_i - A/g_i \quad (2)$$

where  $C_i$  is the concentration of  $\text{CO}_2$  in the intercellular air spaces.

### Models

*A. Effects of  $g_s$  and  $g_i$  on the temperature dependence of the photosynthetic rate.* We compared the measured photosynthetic rates and the predicted photosynthetic rates in HT and LT leaves, respectively (Fig. 4). The predicted photosynthetic rates in HT and LT leaves were calculated for three conditions. For condition (A), we calculated the temperature dependence of  $P_c(C_a)$  at  $C_a = C_i = C_c = 360 \mu\text{l l}^{-1}$  assuming that both  $g_s$  and  $g_i$  were infinite, using Equation A-2 (see Appendix). For condition (B), we calculated the temperature dependence of  $P_c(C_i)$  at  $C_c = C_i$  assuming that  $g_s$  was the value obtained in this study, while  $g_i$  was infinite, using Equation A-2. For condition (C), we calculated the temperature dependence of  $P_c(C_c)$  assuming that both  $g_s$  and  $g_i$  were the values obtained in this study, using Equation A-3 (see Appendix). To obtain these predicted photosynthetic rates, we assumed that day respiration rates ( $R_d$ ) were half the respective dark respiration rates that were reported for HT and LT leaves in our previous studies (Yamori et al. 2005, Yamori et al. 2006). We first calculated the temperature dependence of  $K_c(1 + O/K_o)$  values, using Equation A-4 (see Appendix). The temperature dependences of the Rubisco activation state ( $R^*$ ), the maximum rate of ribulose-1,5-bisphosphate (RuBP) carboxylation ( $V_{\text{cmax}}$ ) and the  $\text{CO}_2$  compensation point in the absence of day respiration ( $\Gamma^*$ ) were obtained from spinach leaves grown under the conditions identical to the present experiment (Yamori et al. 2006).  $IS(C_c)$  in Equation A-4 was determined from  $g_i$  obtained in this study and  $IS(C_i)$  obtained for spinach leaves (Yamori et al. 2005), using Equation A-5 (see Appendix). The data for these parameters at intervals of  $5^\circ\text{C}$  from 10 to  $35^\circ\text{C}$  were obtained by fitting cubic curves. The resultant temperature dependences of  $K_c(1 + O/K_o)$  were generally similar to those reported by Jordan and Ogren (1984) who determined temperature dependences of  $K_c$  and  $K_o$  values in Rubisco purified from spinach leaves grown at  $23/18^\circ\text{C}$  (day/night).

Next, we calculated absolute values of  $V_{\text{cmax}}$  ( $\mu\text{mol m}^{-2} \text{s}^{-1}$ ) to match the Rubisco contents between the measured photosynthetic rates in this study and the estimated photosynthetic rates.  $V_{\text{cmax}}$  on a leaf area basis was estimated from Equation A-3,

at each temperature, using photosynthetic rates and  $C_c$  obtained in this study. Then,  $V_{\text{cmax}}$  values estimated for each temperature were averaged for the HT and LT leaves, respectively.  $V_{\text{cmax}}$  values thus estimated at  $25^\circ\text{C}$  were  $54.1$  and  $73.1 \mu\text{mol m}^{-2} \text{s}^{-1}$  for HT and LT leaves, respectively.

*B. Limitation of photosynthetic rate by  $g_s$  and  $g_i$ .* The limitations of the photosynthetic rate imposed by  $g_s$  and  $g_i$  were calculated from the predicted photosynthetic rates assuming that these conductances were either infinite or finite, according to Farquhar and Sharkey (1982). The limitations of the photosynthetic rate by  $g_s$  ( $Lg_s$ ) and  $g_i$  ( $Lg_i$ ) were estimated as:

$$Lg_s = \frac{P_c(C_a) - P_c(C_i)}{P_c(C_a)} \quad (3)$$

$$Lg_i = \frac{P_c(C_i) - P_c(C_c)}{P_c(C_i)} \quad (4)$$

## Appendix

### $C_3$ photosynthesis model

Photosynthetic rate ( $P$ ) under RuBP carboxylation-limited conditions is expressed as a function of the  $\text{CO}_2$  concentration at the intercellular spaces ( $C_i$ ,  $\mu\text{l l}^{-1}$ ):

$$P_c(C_i) = \frac{V_{\text{cmax}}(C_i - \Gamma^*)}{C_i + K_c(1 + O/K_o)} - R_d \quad (\text{A-1})$$

where  $V_{\text{cmax}}$  ( $\mu\text{mol m}^{-2} \text{s}^{-1}$ ) is the maximum rate of RuBP carboxylation on the leaf area basis,  $K_c$  ( $\mu\text{l l}^{-1}$ ) and  $K_o$  ( $\text{ml l}^{-1}$ ) are the Michaelis constants for  $\text{CO}_2$  and  $\text{O}_2$ , respectively,  $O$  ( $\text{ml l}^{-1}$ ) is the  $\text{O}_2$  concentration,  $R_d$  ( $\mu\text{mol m}^{-2} \text{s}^{-1}$ ) is the day respiration rate, and  $\Gamma^*$  ( $\mu\text{l l}^{-1}$ ) is the  $\text{CO}_2$  compensation point in the absence of day respiration (Farquhar et al. 1980). When the Rubisco activation state ( $R^*$ ) is taken into account (see Yamori et al. 2006),  $P_c(C_i)$  is expressed as:

$$P_c(C_i) = \frac{V_{\text{cmax}}(C_i - \Gamma^*)}{C_i + K_c(1 + O/K_o)} \times R^* - R_d \quad (\text{A-2})$$

$P_c(C_c)$  is expressed as a function of the chloroplastic  $\text{CO}_2$  concentration ( $C_c$ ,  $\mu\text{l l}^{-1}$ ):

$$P_c(C_c) = \frac{V_{\text{cmax}}(C_c - \Gamma^*)}{C_c + K_c(1 + O/K_o)} \times R^* - R_d \quad (\text{A-3})$$

Because the initial slope [ $IS(C_c)$ ] of  $A$  vs. the  $C_c$  curve is identical to  $dP_c(C_c)/dC_c$  at  $C_c = \Gamma^*$ ,  $V_{\text{cmax}}$  is expressed as:

$$V_{\text{cmax}} = \frac{IS(C_c) \times \{\Gamma^* + K_c(1 + O/K_o)\}}{R^*} \quad (\text{A-4})$$

Using the initial slope of  $A$  vs.  $C_i$ ,  $IS(C_i)$ , obtained for spinach leaves grown under conditions identical to the present experiment (Yamori et al. 2005),  $IS(C_c)$  was calculated as:

$$IS(C_c) = \frac{g_i \times IS(C_i)}{g_i - IS(C_i)} \quad (\text{A-5})$$

where  $g_i$  is the internal conductance, the conductance for  $\text{CO}_2$  diffusion from the intercellular airspace to the chloroplast stroma.

### Acknowledgements

We are grateful to Dr. Y. Tazoe (Osaka University, Japan) for instruction in measurements of internal conductance. This work was supported by a grant from JSPS for young research fellows to W.Y.

### References

- Arnon, D. I. (1995) Divergent pathways of photosynthetic electron transfer: the autonomous oxygenic and anoxygenic photosystems. *Photosynth. Res.* 46: 47–71.
- Asada, K. (2000) The water–water cycle as alternative photon and electron sinks. *Philos. Trans. R. Soc. B* 355: 1419–1431.
- Bernacchi, C.J., Portis, A.R.Jr, Nakano, H., von Caemmerer, S. and Long, S.P. (2002) Temperature response of mesophyll conductance. Implications for the determination of Rubisco enzyme kinetics and for limitations to photosynthesis in vivo. *Plant Physiol.* 130: 1992–1998.
- Berry, J.A. and Björkman, O. (1980) Photosynthetic response and adaptation to temperature in higher plants. *Annu. Rev. Plant. Physiol.* 31: 491–543.
- Centritto, M., Loreto, F. and Chantzoulakis, K. (2003) The use of low  $[\text{CO}_2]$  to estimate diffusional and non-diffusional limitations of photosynthetic capacity of salt-stressed olive saplings. *Plant Cell Environ.* 26: 585–594.
- Delfine, S., Alvino, A., Villani, M.C. and Loreto, F. (1999) Restrictions to  $\text{CO}_2$  conductance and photosynthesis in spinach leaves recovering from salt stress. *Plant Physiol.* 119: 1101–1106.
- Delfine, S., Alvino, A., Zacchini, M. and Loreto, F. (1998) Consequences of salt stress on conductance to  $\text{CO}_2$  diffusion, Rubisco characteristics and anatomy of spinach leaves. *Aust. J. Plant Physiol.* 25: 395–402.
- Ethier, G.J. and Livingston, N.J. (2004) On the need to incorporate sensitivity to  $\text{CO}_2$  transfer conductance into the Farquhar–von Caemmerer–Berry leaf photosynthesis model. *Plant Cell Environ.* 27: 137–153.
- Evans, J.R. (1998) Photosynthetic characteristics of fast- and slow-growing species. Inherent variation in plant growth. In *Physiological Mechanisms and Ecological Consequences*. Edited by Lambers, H., Poorter, H. and Vuren, M.M.I.V. pp. 101–119. Backhuys Publishers, Leiden, The Netherlands.
- Evans, J.R. and Loreto, F. (2000) Acquisition and diffusion of  $\text{CO}_2$  in higher plant leaves. In *Photosynthesis: Physiology and Metabolism*. Edited by Leegood, R.C., Sharkey, T.D. and von Caemmerer, S. pp. 321–351. Kluwer Academic Publishers, Dordrecht, The Netherlands.
- Evans, J.R., Terashima, I., Hanba, Y.T. and Loreto, F. (2004)  $\text{CO}_2$  capture by the leaf. In *Photosynthetic Adaptation from the Chloroplast to the Landscape*. Edited by Smith, W.K., Vogelmann, T. and Critchley, C. pp. 107–132. Springer-Verlag, New York.
- Evans, J.R., von Caemmerer, S., Setchell, B.A. and Hudson, G.S. (1994) The relationship between  $\text{CO}_2$  transfer conductance and leaf anatomy in transgenic tobacco with a reduced content of Rubisco. *Aust. J. Plant Physiol.* 21: 475–495.
- Farquhar, G.D. and Sharkey, T.D. (1982) Stomatal conductance and photosynthesis. *Annu. Rev. Plant. Physiol.* 33: 317–345.
- Farquhar, G.D., von Caemmerer, S. and Berry, J.A. (1980) A biochemical model of photosynthetic  $\text{CO}_2$  assimilation in leaves of  $\text{C}_3$  species. *Planta* 149: 78–90.
- Ferrar, P.J., Slatyer, R.O. and Vranjic, J.A. (1989) Photosynthetic temperature acclimation in Eucalyptus species from diverse habitats, and a comparison with *Nerium oleander*. *Aust. J. Plant Physiol.* 16: 199–217.
- Flexas, J., Bota, J., Escalona, J.M., Sampol, B. and Medrano, H. (2002) Effects of drought on photosynthesis in grapevines under field conditions: an evaluation of stomatal and mesophyll limitations. *Funct. Plant Biol.* 29: 461–471.
- Flexas, J., Bota, J., Loreto, F., Cornic, G. and Sharkey, T.D. (2004) Diffusive and metabolic limitations to photosynthesis under drought and salinity in  $\text{C}_3$  plants. *Plant Biol.* 6: 269–279.
- Gillon, J.S. and Yakir, D. (2000) Internal conductance to  $\text{CO}_2$  diffusion and  $\text{C}^{18}\text{O}$  discrimination in  $\text{C}_3$  leaves. *Plant Physiol.* 123: 201–214.
- Guy, C.L., Huber, J.L.A. and Huber, S.C. (1992) Sucrose phosphate synthase and sucrose accumulation at low temperature. *Plant Physiol.* 100: 502–508.
- Hanba, Y.T., Kogami, H. and Terashima, I. (2002) The effect of growth irradiance on leaf anatomy and photosynthesis in *Acer* species differing in light adaptation. *Plant Cell Environ.* 25: 1021–1030.
- Hanba, Y.T., Miyazawa, S.-I. and Terashima, I. (1999) The influence of leaf thickness on the  $\text{CO}_2$  transfer conductance and leaf stable carbon isotope ratio. *Funct. Ecol.* 13: 632–639.
- Hanba, Y.T., Shibusaka, M., Hayashi, Y., Hayakawa, T., Kasamo, K., Terashima, I. and Katsuhara, M. (2004) Overexpression of the barley aquaporin HvPIP2;1 increases internal  $\text{CO}_2$  conductance and  $\text{CO}_2$  assimilation in the leaves of transgenic rice plants. *Plant Cell Physiol.* 45: 521–529.
- Heber, U. (2002) Irrungen, Wirrungen? The Mehler reaction in relation to cyclic electron transport in  $\text{C}_3$  plants. *Photosynth. Res.* 73: 223–231.
- Hendrickson, L., Ball, M.C., Wood, J.T., Chow, W.S. and Furbank, R.T. (2004) Low temperature effects on photosynthesis and growth of grapevine. *Plant Cell Environ.* 27: 795–809.
- Hesketh, J.D., Larson, E.M., Gordon, A.J. and Peters, D.B. (1983) Internal factors influencing photosynthesis and respiration. In *The Growth and Functioning of Leaves*. Edited by Dale, J.E. and Milthorpe, F.L. pp. 381–411. Cambridge University Press, Cambridge.
- Hikosaka, K. (2005) Nitrogen partitioning in the photosynthetic apparatus of *Plantago asiatica* leaves grown at different temperature and light conditions: similarities and differences between temperature and light acclimation. *Plant Cell Physiol.* 46: 1283–1290.
- Hikosaka, K. and Hirose, T. (2001) Temperature acclimation of the photosynthetic apparatus in an evergreen shrub, *Nerium oleander*. PS2001 Proceedings of the 12th International Congress on Photosynthesis. S35-007, CSIRO Publishing, Melbourne, Australia.
- Hikosaka, K., Ishikawa, K., Borjigidai, A., Muller, O. and Onoda, Y. (2006) Temperature acclimation of photosynthesis: mechanisms involved in the changes in temperature dependence of photosynthetic rate. *J. Exp. Bot.* 57: 291–302.
- Hikosaka, K., Murakami, A. and Hirose, T. (1999) Balancing carboxylation and regeneration of ribulose biphosphate in leaf photosynthesis: temperature acclimation in an evergreen tree, *Quercus myrsinaefolia*. *Plant Cell Environ.* 22: 841–849.
- Jordan, D.B. and Ogren, W.L. (1984) The  $\text{CO}_2/\text{O}_2$  specificity of ribulose 1,5-biphosphate carboxylase/oxygenase. Dependence on ribulose biphosphate concentration, pH and temperature. *Planta* 161: 308–313.
- Kirshbaum, M.U.F. and Farquhar, G.D. (1984) Temperature dependence of whole-leaf photosynthesis in *Eucalyptus pauciflora* Seib. Ex Spreng. *Aust. J. Plant Physiol.* 11: 519–538.
- Kogami, H., Hanba, Y.T., Kibe, T., Terashima, I. and Masuzawa, T. (2001)  $\text{CO}_2$  transfer conductance, leaf structure and carbon isotope composition of *Polygonum cuspidatum* leaves from low and high altitudes. *Plant Cell Environ.* 24: 529–538.
- Loreto, F., Centritto, M. and Chantzoulakis, K. (2003) Photosynthetic limitations in olive cultivars with different sensitivity to salt stress. *Plant Cell Environ.* 26: 595–601.

- Makino, A., Nakano, H. and Mae, T. (1994) Responses of ribulose-1,5-bisphosphate carboxylase, cytochrome *f*, and sucrose synthesis enzymes in rice leaves to leaf nitrogen and their relationships to photosynthesis. *Plant Physiol.* 105: 173–179.
- Makino, A., Sakashita, H., Hidema, J., Mae, T., Ojima, K. and Osmond, B. (1992) Distinctive responses of ribulose-1,5-bisphosphate carboxylase and carbonic anhydrase in wheat leaves to nitrogen nutrition and their possible relationship to CO<sub>2</sub> transfer resistance. *Plant Physiol.* 100: 1737–1743.
- Miyazawa, S.-I. and Terashima, I. (2001) Slow development of leaf photosynthesis in an evergreen broad-leaved tree, *Castanopsis sieboldii*: relationships between leaf anatomical characteristics and photosynthetic rate. *Plant Cell Environ.* 24: 279–291.
- Niinemets, Ü., Cescatti, A., Rodeghiero, M. and Tosens, T. (2005) Leaf internal diffusion conductance limits photosynthesis more strongly in older leaves of Mediterranean evergreen broad-leaved species. *Plant Cell Environ.* 28: 1552–1566.
- Nobel, P.S. (1991) *Physicochemical and Environmental Plant Physiology*. Academic Press, San Diego, CA.
- Öquist, G. and Huner, N.P. (2003) Photosynthesis of overwintering evergreen plants. *Annu. Rev. Plant Biol.* 54: 329–355.
- Park, I.-K. and Tsunoda, S. (1979) Effect of low temperature on chloroplast structure in cultivars of rice. *Plant Cell Physiol.* 20: 1449–1453.
- Price, G.D., von Caemmerer, S., Evans, J.E., Yu, J.-E., Lloyd, L., Oja, V., Kell, P., Harrison, K., Gallagher, A. and Badger, M.R. (1994) Specific reduction of chloroplast carbonic anhydrase activity by antisense RNA in transgenic tobacco plants has a minor effect on photosynthetic CO<sub>2</sub> assimilation. *Planta* 193: 331–340.
- Sasaki, H., Samejima, M. and Ishii, R. (1996) Analysis by delta-13C measurement on mechanism of cultivar difference in leaf photosynthesis of rice (*Oryza sativa* L.). *Plant Cell Physiol.* 37: 1161–1166.
- Scartazza, A., Lauteri, M., Guido, M.C. and Brugnoli, E. (1998) Carbon isotope discrimination in leaf and stem sugars, water use efficiency and mesophyll conductance during different developmental stages in rice subjected to drought. *Aust. J. Plant Physiol.* 25: 489–498.
- Sharkey, T.D. (2005) Effects of moderate heat stress on photosynthesis: importance of thylakoid reactions, Rubisco deactivation, reactive oxygen species, and thermotolerance provided by isoprene. *Plant Cell Environ.* 28: 269–277.
- Syvrtsen, J.P., Lloyd, J., McConchie, C., Kriedemann, P.E. and Farquhar, G.D. (1995) On the relationship between leaf anatomy and CO<sub>2</sub> diffusion through the mesophyll of hypostomatous leaves. *Plant Cell Environ.* 18: 149–157.
- Terashima, I., Hanba, Y.T., Tazoe, Y., Vyas, P. and Yano, S. (2006) Irradiance and phenotype: comparative eco-development of sun and shade leaves in relation to photosynthetic CO<sub>2</sub> diffusion. *J. Exp. Bot.* 57: 343–354.
- Terashima, I. and Ono, K. (2002) Effects of HgCl<sub>2</sub> on CO<sub>2</sub> dependence of leaf photosynthesis: evidence indicating involvement of aquaporins in CO<sub>2</sub> diffusion across the plasma membrane. *Plant Cell Physiol.* 43: 70–78.
- Uehlein, N., Lovisolo, C., Siefritz, F. and Kaldenhoff, R. (2003) The tobacco aquaporin NtAQP1 is a membrane CO<sub>2</sub> pore with physiological functions. *Nature* 425: 734–737.
- von Caemmerer, S. and Evans, J.R. (1991) Determination of the average partial pressure of CO<sub>2</sub> in chloroplasts from leaves of several C<sub>3</sub> plants. *Aust. J. Plant Physiol.* 18: 287–305.
- von Caemmerer, S. and Farquhar, G.D. (1981) Some relationships between the biochemistry of photosynthesis and the gas exchange of leaves. *Planta* 153: 376–387.
- Warren, C.R. (2004) The photosynthetic limitation posed by internal conductance to CO<sub>2</sub> movement is increased by nutrient supply. *J. Exp. Bot.* 55: 2313–2321.
- Warren, C.R., Ethier, G.J., Livingston, N.J., Grant, N.J., Turpin, D.H., Harrison, D.L. and Black, T.A. (2003) Transfer conductance in second growth Douglas-fir (*Pseudotsuga menziesii* (Mirb.)Franco) canopies. *Plant Cell Environ.* 26: 1215–1227.
- Williams, D.G. and Black, R.A. (1993) Phenotypic variation in contrasting temperature environments: growth and photosynthesis in *Pennisetum setaceum* from different altitudes on Hawaii. *Funct. Ecol.* 7: 623–633.
- Yamori, W., Noguchi, K. and Terashima, I. (2005) Temperature acclimation of photosynthesis in spinach leaves: analyses of photosynthetic components and temperature dependencies of photosynthetic partial reactions. *Plant Cell Environ.* 28: 536–547.
- Yamori, W., Suzuki, K., Noguchi, K., Nakai, M. and Terashima, I. (2006) Effects of Rubisco kinetics and Rubisco activation state on the temperature dependence of the photosynthetic rate in spinach leaves from contrasting growth temperatures. *Plant Cell Environ* 29: 1659–1670.

(Received May 11, 2006; Accepted June 7, 2006)
